# Supplementary material for: The Potential of Edible and Medicinal Resource Polysaccharides for Prevention and Treatment of Neurodegenerative Diseases
Source: MDPI journal article supplement (doi:10.3390/biom13050873), 2023-05-22
Supplement: s1 [file s1]

# **The Potential of Edible and Medicinal Resources Polysaccharides for Prevention and Treatment of Neurodegenerative Diseases**

**Qingxia Gan<sup>1,2</sup>, Yugang Ding<sup>1,2</sup>, Maoyao Peng<sup>1,2</sup>, Linlin Chen<sup>1,2</sup>, Jijing Dong<sup>1,2</sup>, Jiayi hu<sup>1</sup>, Yuntong Ma<sup>1,2,\*</sup>**

<sup>1</sup> College of Pharmacy, Chengdu University of Traditional Chinese Medicine, No.1166, Liutai Road, Wenjiang District, Chengdu, 611137, China

<sup>2</sup> State Key Laboratory of Traditional Chinese Medicine Processing Technology, State Administration of Traditional Chinese Medicine, No.1166, Liutai Road, Wenjiang District, Chengdu, 611137, China

\* Correspondence: mayuntong@cdutcm.edu.cn

**Table S1.** Summary of the role of polysaccharides in the regulation of neurodegenerative diseases.

| Sources of polysaccharides                           | Characterization                                                 | Models                                                                                                                                              | Doses and time of polysaccharides                                                                                          | Biological activity                                                                                                                                                                                                                             | References |
|------------------------------------------------------|------------------------------------------------------------------|-----------------------------------------------------------------------------------------------------------------------------------------------------|----------------------------------------------------------------------------------------------------------------------------|-------------------------------------------------------------------------------------------------------------------------------------------------------------------------------------------------------------------------------------------------|------------|
| 1. <i>Abelmoschus moschatus</i> polysaccharides (OP) | Man, Rha, Glc, Gal, and Ara                                      | 1.0 mg/mL of 2 $\mu$ L A $\beta$ 1–42 induced AD model mice, 1 time                                                                                 | 300, 600 mg/kg (OPL) for 8 weeks                                                                                           | ↓Cognitive impairment<br>↑PI3K and AKT, pERK1/2<br>↓GSK3 $\beta$<br>↑PI3K/AKT and ERK pathways                                                                                                                                                  | [20]       |
| 2. <i>Inonotus obliquus</i> polysaccharides (IOP)    | 111.9 kDa, no nucleic acids or proteins                          | 25mM L-Glu-induced HT22 cell for 24h<br>APP/PS1 mice                                                                                                | Pre-treated with 5 or 10 $\mu$ g/mL for 3 h<br>25 or 50 mg/kg for 8 weeks                                                  | ↑Spatial learning and memory<br>↓Oxidative stress, apoptosis<br>↓Deposition of A $\beta$ 1–42 and P-Tau<br>↑Bcl-2, Nrf2, HO-1, SOD-1, GCLC<br>↓Bax, Keap1<br>↑Nrf2 pathway                                                                      | [22]       |
| 3. <i>Ganoderma lucidum</i> polysaccharides (GLP)    | 15.0 kDa                                                         | APP/PS1 transgenic mice<br>1 ng/mL EGF and 1 ng/mL bFGF induced neural progenitor cell for 24 h<br>C57B/6 male mice were intraperitoneally injected | 30 and 200 mg/kg for 90 days<br>After-treated with 300 mg/mL for 24h<br>After-treated with 100 mg/kg were given for 7 days | ↑Cognitive Function<br>↑NPC Proliferation<br>↑FGFR1, p-ERK, p-AKT<br>↑ERK and AKT pathway<br>↑Cell viability<br>↓Dyskinesia                                                                                                                     | [24]       |
| 4. <i>Momordica Charantia</i> polysaccharides (MCP)  | 85-100 kDa<br>Ara, Xyl, Gal, and Rha (1.01 : 1.13 : 4.17 : 1.67) | 25 mg/kg MPTP for 7 days<br>1mM MPP <sup>+</sup> induced SK-N-SH cells for 24 hours                                                                 | After-treated with 80 $\mu$ g/mL for 24 hours                                                                              | ↓Inflammation, Oxidative Stress, and Apoptosis<br>↑DA, DOPAC, HVA, GSH, SOD, Bcl-2<br>↓5-HT, 5-HIAA, TNF- $\alpha$ , IL-1 $\beta$ , MDA, Cytochrome C, Bax, cleaved Caspase-3 in the brain tissue<br>↑TH in the striatum<br>↓TLR4, MyD88, p-p65 | [25]       |

|                                                 |                                                             |                                                                                                                                                 |                                                          |                                                           |              |      |
|-------------------------------------------------|-------------------------------------------------------------|-------------------------------------------------------------------------------------------------------------------------------------------------|----------------------------------------------------------|-----------------------------------------------------------|--------------|------|
| 5. <i>Lycium barbarum</i> polysaccharides (LBP) | Man, Glc, Gal, Xyl and Ara (6.52: 78.12: 8.85: 1.81: 4.69.) | HEK293 cells were transfected with EGFP-exon-1 htt-20Q and EGFP-exon-1 htt-160Q HD-N171-82Q-81 (also known as B6C3-Tg (HD82Gln)81Dbo/J Tg) mice | After-treated with 9.6 μg/μL LBP for 24 h.               | ↓TLR4/MyD88/NF-κB pathway                                 | [26]         |      |
|                                                 |                                                             |                                                                                                                                                 |                                                          | ↑Life span, body weight, motor functions                  |              |      |
|                                                 |                                                             |                                                                                                                                                 |                                                          | ↓mHtt aggregates, caspase-3                               |              |      |
|                                                 |                                                             |                                                                                                                                                 |                                                          | ↑p-AKT-Ser473                                             |              |      |
|                                                 |                                                             |                                                                                                                                                 |                                                          | 40 mg/kg body weight per day for 10 weeks                 | ↑AKT pathway | [44] |
|                                                 |                                                             | 30 mg/kg/d MPTP induced male C57BL/6 mice for 5 days                                                                                            | After-treated with 100 and 200 mg/kg for 16 days         | ↑Spontaneity, coordination, learning and memory abilities |              |      |
|                                                 |                                                             |                                                                                                                                                 |                                                          | ↓aggregation of α-syn                                     |              |      |
|                                                 |                                                             |                                                                                                                                                 |                                                          | ↓Dopaminergic Neurodegeneration, LC3I/II and Beclin       |              |      |
|                                                 |                                                             |                                                                                                                                                 |                                                          | ↑SOD2、CAT and GPX1                                        | [104]        |      |
|                                                 |                                                             |                                                                                                                                                 |                                                          | ↑p-AKT and mTOR                                           |              |      |
|                                                 |                                                             | ↑PTEN/AKT/mTOR pathway                                                                                                                          |                                                          |                                                           |              |      |
|                                                 |                                                             | ↑Cognitive functions                                                                                                                            |                                                          |                                                           |              |      |
|                                                 |                                                             | APP/PS1 transgenic mice                                                                                                                         | Oral administration of 50 mg/kg for 3 months             | ↑Neurogenesis                                             | [121]        |      |
|                                                 |                                                             | HEK293/APPswe cells                                                                                                                             | 300 μg/ml for 24 hours                                   | ↓Synaptic dysfunction                                     |              |      |
|                                                 |                                                             |                                                                                                                                                 |                                                          | ↓Aβ levels and amyloid plaque burden                      |              |      |
|                                                 |                                                             |                                                                                                                                                 |                                                          | ↓Oxidative damage, apoptosis                              |              |      |
|                                                 |                                                             | HTM cells were exposed to 200 μM H2O2 for 24 h                                                                                                  | Pre-treated with 100, 200,300, 400 and 500 μg/mL for 1 h | ↑ miR-4295                                                | [122]        |      |
|                                                 |                                                             |                                                                                                                                                 |                                                          | ↓Cleaved-caspase-3/-9 and ROS                             |              |      |
|                                                 |                                                             |                                                                                                                                                 |                                                          | ↑PI3K/AKT and ERK signaling pathways                      |              |      |
|                                                 |                                                             | N2a cells 3.75μM TMT for 24h                                                                                                                    | Pre-treated with 300 μg/mL for 24 h                      | ↓Apoptosis and oxidative stress                           |              |      |

|                                                     |                                                           |                                                   |                                                   |                                                                                                                                                                                                                                                                                                      |       |
|-----------------------------------------------------|-----------------------------------------------------------|---------------------------------------------------|---------------------------------------------------|------------------------------------------------------------------------------------------------------------------------------------------------------------------------------------------------------------------------------------------------------------------------------------------------------|-------|
| 6. <i>Codonopsis pilosula</i> polysaccharides (CPP) | L-Rha, Glc, and erythritol                                | 20 mM L-Glu-induced PC12 cells for 24 h           | Pre-treated with 10 and 30 µg/ml alone for 3 h    | ↑Bcl-2, SOD, caspase-3, p-GSK-3β, p-Akt, Shh, Gli1, CyclinD1<br>↓ROS, MDA<br>↑Shh and PI3K/Akt pathways<br>↓Apoptosis and oxidative stress<br>↑MMP, Bcl-2, p-Akt, and p-ERKs<br>↓ ROS, Bax, caspase-3<br>↑Akt and ERK pathway<br>↓Mitochondrial apoptotic pathway<br>↓Oxidative stress and apoptosis | [123] |
|                                                     |                                                           | PC12 cells induced by 400 µM H2O2 for 24h         | Co-treated with 125-500 µg/ml for 24 h            | ↓Caspase-3, Caspase -9, ROS,<br>↑Nrf2 and HO-1 mRNA and protein<br>↑Nrf2/HO-1 pathway                                                                                                                                                                                                                | [133] |
|                                                     | 45.0 kDa;<br>Ara, Gal, Glc and Rha (47.8: 49.8: 1.4: 1.2) | HEK293-APP <sup>sw</sup> cells                    | 0.6, 1.1, 2.2 µM for 24 h or for 72 h             | ↓Aβ <sub>42</sub> production and aggregation                                                                                                                                                                                                                                                         | [134] |
|                                                     |                                                           | 75 µM 6-OHDA induced PC12 cells for 24 h          | Pre-treated with 100, 300, 600 µg/mL LBP for 24 h | ↓Apoptosis and oxidative stress<br>↓ROS, NO, 3-NT, intracellular free Ca <sup>2+</sup> , NF-κB, nNOS, iNOS, caspase-3<br>↓ROS-NO pathway                                                                                                                                                             | [135] |
|                                                     |                                                           | APP/PS1 mice                                      | 100 and 300 mg/kg for one month                   | ↑Cognitive ability<br>↓Aβ <sub>1-42</sub> deposition                                                                                                                                                                                                                                                 |       |
|                                                     |                                                           | N2a and HEK293 cells transfected with APP plasmid | 200µg/ml for 24h                                  | ↑synaptic plasticity, synaptic proteins (PSD95, synaptotagmin)<br>↓BACE1                                                                                                                                                                                                                             | [40]  |

|                                                                     |                                                       |                                                                                                              |                                                              |                                                                                                                                                                                                                      |       |
|---------------------------------------------------------------------|-------------------------------------------------------|--------------------------------------------------------------------------------------------------------------|--------------------------------------------------------------|----------------------------------------------------------------------------------------------------------------------------------------------------------------------------------------------------------------------|-------|
|                                                                     |                                                       | Injected 2 ml of 6.82×10 <sup>12</sup> v.g./ml AAV2/hTau into the hippocampus of C57/BL6 mice                | After-treated with 100, 300 mg/kg for 1 month.               | ↓Memory Deficits<br>↑PP2A Activity<br>↓Tau Phosphorylation<br>↑Synaptic Plasticity and Functions<br>↑Synaptotagmin, synaptophysin                                                                                    | [43]  |
|                                                                     | Man (1.76%), Glc (97.38%), and Ara (0.76%).           | HEK293/tau cells                                                                                             | After-treated with 50, 100, 200 mg/ml for 48 h.              | ↑Cellular Viability<br>↑ATP, MMP, NAD <sup>+</sup> 、NAD <sup>+</sup> /NADH、SIRT3、SIRT1, PGC-1α<br>↓ROS<br>↑Cognitive ability<br>↓Inflammation<br>↓Aβ deposition and tau hyperphosphorylation<br>↓ChAT, Ach, MDA, ROS | [136] |
| 7. <i>Hericium erinaceus</i> polysaccharides (PHEB)                 | 36.1 kDa<br>D-Gal, D- Glc, D- Man and D-GlcA          | APP/PS1 mice                                                                                                 | 25 and 100 mg/kg for six weeks after fed for 24 weeks        | ↑AChE, SOD, CAT, GSH-Px<br>↑Nrf2, HO-1, GABBR1, PKA, GluT1, Neurogranin, p-Akt, p-mTOR<br>↓Keap1, CaMK IV, p-CaMK II, ERK 1/2, Ras, P-GluR2<br>↑Akt/ mTOR and Nrf2 pathway                                           | [41]  |
| 8. <i>Schisandra chinensis</i> (Turcz.) Baill polysaccharides (SCP) | Ara, Glc, Gal, Man, Ribose, Xyl, GlcA, Rha and Fucose | AD model induced by 10 μg of 2 μg/μL Aβ <sub>25-35</sub> injection in the rat hippocampal CA1 region, 1 time | After-treated with 38.15 mg kg 1 day for 56 consecutive days | ↑Spatial learning and memory ability<br>↓AChE, GSK-3β, NOS, Glu, Asp<br>↓Aβ <sub>25-35</sub> and p-Tau aggregations<br>↑SOD, 5-HT, NE, DA, Ach, Tau, GABA, Gly                                                       | [42]  |

|                                                          |                                                         |                                                                                                                    |                                                                          |                                                                                                                                                                                                                                                                        |       |
|----------------------------------------------------------|---------------------------------------------------------|--------------------------------------------------------------------------------------------------------------------|--------------------------------------------------------------------------|------------------------------------------------------------------------------------------------------------------------------------------------------------------------------------------------------------------------------------------------------------------------|-------|
| 9. <i>Angelica sinensis</i> polysaccharides (ASP)        | Man, Rha, GlcA, Glc, Gal, and Ara                       | Male KM mice were intracerebroventricular injected with 3μL Aβ1–42 peptide into the left lateral ventricle, 1 time | After-treated with 260 mg/kg for 28 consecutive days (i.g.).             | ↑Learning memory, cognitive capacity<br>↓Inflammation, activation of astrocytes and microglia<br>↓Aβ deposition<br>↓NF-κB in nuclear, p-p-38, p-JNK, p-ERK, IL-1β, IL-6, TNF-α<br>↑NF-κB and IκB-α in cytosolic<br>↓NF-κB/MAPK pathway<br>↑Spatial learning and memory | [79]  |
|                                                          |                                                         | All rats were injected with 5μL of 4 μg/μL Aβ25–35 into bilateral CA1 subregion, 1 time                            | After-treated with 50 mg/kg for 4 weeks                                  | ↓Inflammatory, apoptosis<br>↑Ach, chAT, SOD, CAT, BDNF, TrkB, p-Akt, p-CREB<br>↓MDA, AchE, IL-1β, IL-6, TNF-α<br>↑BDNF/TrkB/CREB pathway.                                                                                                                              | [45]  |
|                                                          |                                                         | Male Nestin-GFP transgenic mice were subcutaneously injected with 200 mg/kg D-Gal for 42 days                      | 140mg/kg ASP, ip, for 27days since the 16th day of D-Gal induction model | ↑Cognitive ability<br>↓Oxidative stress, inflammatory<br>↑Na <sup>+</sup> -K <sup>+</sup> - ATP, SOD, T-AOC<br>↓MDA, IL-1β, IL-6, TNF-α, ROS, p53 mRNA, p21 mRNA<br>↓P53/p21 pathway                                                                                   | [127] |
| 10. <i>Astragalus membranaceus</i> polysaccharides (APS) | 19.5% Ara, 6.4% Rha, 15.6%Gal, 29.5% GalA and 29.0%Glc. | NSCs Induced by 20mg/mL D-gal for 48h                                                                              | After-treated with 100 μg/ml for 24h                                     | ↓P53/p21 pathway                                                                                                                                                                                                                                                       |       |
|                                                          |                                                         | <i>C. elegans</i> strain AM141                                                                                     | 0.25, 1.0, 2.5, 5mg/ml for 24, 48, 72, 96 h                              | ↓polyQ aggregates                                                                                                                                                                                                                                                      |       |
|                                                          |                                                         | <i>C. elegans</i> strain HA759                                                                                     | 0.25, 1.0, 2.5mg/ml for 3 days at 15°C                                   | ↓Neurotoxicity                                                                                                                                                                                                                                                         | [46]  |
|                                                          |                                                         | <i>C. elegans</i> strain N2, AM141, HA759                                                                          | 1.0, 2.5mg/ml until death at 15°C                                        | ↑Lifespan                                                                                                                                                                                                                                                              |       |

|                                                                                       |                                                                                 |                                                      |                                                                                                                                                                           |       |
|---------------------------------------------------------------------------------------|---------------------------------------------------------------------------------|------------------------------------------------------|---------------------------------------------------------------------------------------------------------------------------------------------------------------------------|-------|
|                                                                                       | <i>C. elegans</i> strain N2, AM141, HA759                                       | 1 mg/ml for 3 days                                   | ↑DAF-16/FOXO<br>↓Gene scl-20<br>↓Inflammation                                                                                                                             |       |
|                                                                                       | BV2 microglial cells induced by 50 ng/ml LPS for 24 h                           | Pre-treated with 0, 50, 100, or 200 µg/ml for 1 h    | ↓iNOS mRNA, COX-2 mRNA, TNF- $\alpha$ mRNA, IL-1 $\beta$ mRNA, TNF- $\alpha$ , IL-1 $\beta$ , NO, PGE2<br>↓NF- $\kappa$ B and PKB pathway<br>↑Autophagy<br>↑LC3-I→LC3-II  | [83]  |
|                                                                                       | 100 µM 6-OHDA in PC12 cells for further 24 h                                    | Co-treated with 0,50, 100 and 200 µM for 24 h        | ↓p-mTOR and p-Akt mRNA and protein<br>↑PTEN mRNA and protein<br>↓PI3K/AKT/mTOR pathway<br>↓Oxidative stress and apoptosis<br>↓Deposition of A $\beta$ 40 and A $\beta$ 42 | [100] |
|                                                                                       | APP/PS1 mice                                                                    | 200 mg/kg b.w./d, for 2 months                       | ↑Nrf2 in the nucleus, SOD, GSH-Px<br>↓Nrf2 in the cytoplasm, Keap1, MDA<br>↑Nrf2 pathway                                                                                  | [117] |
| 5.14 kDa;<br>Myo-inositol:<br>fructose: sorbitol:<br>Glc<br>(1:1.4:2.1:13.7:91.5<br>) | APP/PS1 mice                                                                    | 500 mg/kg twice per day for 7 weeks                  | ↑Cognitive ability<br>↓Neuroinflammation<br>↓Activation of Astrocytes and Microglia                                                                                       | [137] |
| 19.2% Ara, 6.9% Rha, 16.0% Gal, 28.8% Glc, and 29.1% GalA.                            | 50mM 6-OHDA induced transgenic <i>C. elegans</i> strain BZ555 for 1 h at 20 °C. | 0.5, 1, 2,4mg/mL for 72h<br><br>2.0mg/mL until death | ↓Food-Sensing deficit, degeneration of dopaminergic neurons<br><br>↑Lifespan                                                                                              | [138] |

|                                                                        |                                                                  |                                          |  |                                                  |                                                                                                                                                                                                                                       |      |
|------------------------------------------------------------------------|------------------------------------------------------------------|------------------------------------------|--|--------------------------------------------------|---------------------------------------------------------------------------------------------------------------------------------------------------------------------------------------------------------------------------------------|------|
|                                                                        |                                                                  |                                          |  | 2.0mg/mL for 72h                                 | ↓Oxidative stress<br>↓ROS, MDA, Gene egl-1<br>↑SOD, GPx, AChE                                                                                                                                                                         |      |
| 11. <i>Trametes versicolor</i><br>Polysaccharides<br>(PSK)             |                                                                  | APP/PS1 mice                             |  | 2 mg/mouse, 3 times/week for 6 months (i.p.)     | ↓Cognitive deficits<br>↓Activation of astrocytes and microglia<br>↓Aβ40, total Aβ, Aβ42 in brain, serum Aβ42<br>↓pro-inflammatory cytokines TNF-α and IL-6 in brain homogenates, caspase-3<br>↓Tau Phosphorylation in the hippocampus | [54] |
| 12. <i>Fomes officinalis</i><br>Ames<br>polysaccharides<br>(FOAP)      | Ara, Xyl, Man, Glc, and Gal                                      | 40μM Aβ25–35 induced PC12 cells for 48 h |  | After-treated with 50, 100 and 200 lg/mL for 2 h | ↓Apoptosis, oxidative stress<br>↑Cell viability<br>↓LDH, ROS, MDA<br>↑Bcl-2/Bax, SOD, MMP, ATP                                                                                                                                        | [67] |
| 13. <i>Epimedium brevicornum</i><br>polysaccharides<br>(EbPS-A1)       | 56.7% GalA, 19.4%Gal and 16.1%Rha but also 5.9%Ara and 2.0% GlcA | <i>C. elegans</i> HA759                  |  | 0.5, 1, 2, 4 mg/mL for 3 days at 20°C.           | ↓Chemosensory dysfunction                                                                                                                                                                                                             | [68] |
|                                                                        |                                                                  |                                          |  | 2 mg/mL at 20°C for 3 days                       | ↓Free radicals, ROS, MDA<br>↑SOD                                                                                                                                                                                                      |      |
| 14. <i>Saccharina japonica</i> sulfated hetero-polysaccharides<br>(UF) | Fucose: Uronic Acid: Sulfate (19.12:14.25:21.2)                  | 100 μM H2O2-induced SH-SY5Y for 24 h.    |  | Co-treated with 100, 500, 800 μg/mL for 24 h     | ↓Apoptotic<br>↑p-PI3K, p-Akt, p-NGF<br>↓Bcl-2, Bad/bax, caspase-3, caspase-8, caspase-9, GSK3β, Cyt c, p53<br>↑PI3K/Akt Pathway                                                                                                       | [53] |



|                                                          |                                           |                                                                                                            |                                                                                      |                                                                                                                                                                                                                                                                                                                                                                                                                                                                                                                                                                                                                                                                                                                                                  |                        |
|----------------------------------------------------------|-------------------------------------------|------------------------------------------------------------------------------------------------------------|--------------------------------------------------------------------------------------|--------------------------------------------------------------------------------------------------------------------------------------------------------------------------------------------------------------------------------------------------------------------------------------------------------------------------------------------------------------------------------------------------------------------------------------------------------------------------------------------------------------------------------------------------------------------------------------------------------------------------------------------------------------------------------------------------------------------------------------------------|------------------------|
|                                                          |                                           |                                                                                                            |                                                                                      | ↓Behavioral deficits<br>↓Oxidative stress<br>↑TH-positive neurons and striatal TH-positive fibers, mitochondrial respiratory capacity<br>↑DA, DOPAC, PGC-1 $\alpha$ , NRF2<br>↓MDA, 3-NT, 8-OHdG<br>↑Nrf2 pathway<br>↓Inflammation<br>↓NO production, iNOS expression, p-p38 and p-ERK<br>↓p38 and ERK pathway<br>↓Paralysis rate<br>↓deposition of A $\beta$ protein<br>↓ROS<br>↑hsp16.2 expression<br>↓Motor deficits<br>↓Mitochondrial dysfunction<br>↓Neuronal apoptosis<br>↓Dopaminergic neuron<br>↑ATP5F1a protein<br>↑Cognitive function<br>↓Inflammation, apoptosis<br>↓A $\beta$ deposits<br>↓Mitochondrial dysfunction<br>↑Neurogenesis<br>↓Bradykinesia<br>↓striatal depletion of DA, DOPAC and HVA<br>↑TH gene and nigral TH protein |                        |
| 15. <i>Laminaria japonica</i> polysaccharides (Fucoidan) | Fucose: Gal (1.0:0.24)                    | Subcutaneous injection of 1.5 mg/kg/d rotenone induced Male Sprague–Dawley rats 5 times a week for 4 weeks | 35, 70, 140 mg/kg/d started 10 days before rotenone induction, for 38 days           | ↑TH-positive neurons and striatal TH-positive fibers, mitochondrial respiratory capacity<br>↑DA, DOPAC, PGC-1 $\alpha$ , NRF2<br>↓MDA, 3-NT, 8-OHdG<br>↑Nrf2 pathway<br>↓Inflammation<br>↓NO production, iNOS expression, p-p38 and p-ERK<br>↓p38 and ERK pathway<br>↓Paralysis rate<br>↓deposition of A $\beta$ protein<br>↓ROS<br>↑hsp16.2 expression<br>↓Motor deficits<br>↓Mitochondrial dysfunction<br>↓Neuronal apoptosis<br>↓Dopaminergic neuron<br>↑ATP5F1a protein<br>↑Cognitive function<br>↓Inflammation, apoptosis<br>↓A $\beta$ deposits<br>↓Mitochondrial dysfunction<br>↑Neurogenesis<br>↓Bradykinesia<br>↓striatal depletion of DA, DOPAC and HVA<br>↑TH gene and nigral TH protein                                              | [69]<br>[112]<br>[139] |
| 16. Fucoidan from <i>Fucus vesiculosus</i> (FVF)         | Fucans, Gal, Xyl.                         | Microglial cells induced by 0.01 $\mu$ g/ml LPS for 24h                                                    | Pre-treated with 31.25, 62.5 and 125 $\mu$ g/ mL for 10 min                          | ↓deposition of A $\beta$ protein<br>↓ROS<br>↑hsp16.2 expression<br>↓Motor deficits<br>↓Mitochondrial dysfunction<br>↓Neuronal apoptosis<br>↓Dopaminergic neuron<br>↑ATP5F1a protein<br>↑Cognitive function<br>↓Inflammation, apoptosis<br>↓A $\beta$ deposits<br>↓Mitochondrial dysfunction<br>↑Neurogenesis<br>↓Bradykinesia<br>↓striatal depletion of DA, DOPAC and HVA<br>↑TH gene and nigral TH protein                                                                                                                                                                                                                                                                                                                                      | [140]                  |
| 17. Korean red ginseng polysaccharides (NFP)             | GalA, Gal, and Ara (139.6:74.7: 63.4)     | <i>C. elegans</i> GMC101                                                                                   | 20, 100, 500 and 2500 ng/ml for 31 h from 16 °C to 25 °C                             | ↓deposition of A $\beta$ protein<br>↓ROS<br>↑hsp16.2 expression<br>↓Motor deficits<br>↓Mitochondrial dysfunction<br>↓Neuronal apoptosis<br>↓Dopaminergic neuron<br>↑ATP5F1a protein<br>↑Cognitive function<br>↓Inflammation, apoptosis<br>↓A $\beta$ deposits<br>↓Mitochondrial dysfunction<br>↑Neurogenesis<br>↓Bradykinesia<br>↓striatal depletion of DA, DOPAC and HVA<br>↑TH gene and nigral TH protein                                                                                                                                                                                                                                                                                                                                      | [139]                  |
| 18. <i>Chlorella pyrenoidosa</i> polysaccharides         | Glc (69.14%), Rha (15.36%), Gal (14.29%), | 20 mg/kg MPTP induced male C57BL/6 mice                                                                    | 10 and 40 mg/kg for 8days starting from one day before MPTP injection                | ↓Mitochondrial dysfunction<br>↓Neuronal apoptosis<br>↓Dopaminergic neuron<br>↑ATP5F1a protein<br>↑Cognitive function<br>↓Inflammation, apoptosis<br>↓A $\beta$ deposits<br>↓Mitochondrial dysfunction<br>↑Neurogenesis<br>↓Bradykinesia<br>↓striatal depletion of DA, DOPAC and HVA<br>↑TH gene and nigral TH protein                                                                                                                                                                                                                                                                                                                                                                                                                            | [140]                  |
|                                                          |                                           | 5XFAD mice                                                                                                 | 200 mg/kg for 3 weeks                                                                | ↓Mitochondrial dysfunction<br>↑Neurogenesis<br>↓Bradykinesia<br>↓striatal depletion of DA, DOPAC and HVA<br>↑TH gene and nigral TH protein                                                                                                                                                                                                                                                                                                                                                                                                                                                                                                                                                                                                       | [80]                   |
|                                                          |                                           | Male C57BL/6 mice with 15 mg/kg MPTP four times at 2h interval (i.p.).                                     | Oral administration 100,200 mg/kg/d was started 11 days before modeling, for 19 days | ↓Bradykinesia<br>↓striatal depletion of DA, DOPAC and HVA<br>↑TH gene and nigral TH protein                                                                                                                                                                                                                                                                                                                                                                                                                                                                                                                                                                                                                                                      | [81]                   |

|                                                      |                                                                          |                                                                                                                                                                                                                                                                                                        |                                                                                                                                                                                  |                                                                                                                                                                                                                                                                                                                                                                    |      |
|------------------------------------------------------|--------------------------------------------------------------------------|--------------------------------------------------------------------------------------------------------------------------------------------------------------------------------------------------------------------------------------------------------------------------------------------------------|----------------------------------------------------------------------------------------------------------------------------------------------------------------------------------|--------------------------------------------------------------------------------------------------------------------------------------------------------------------------------------------------------------------------------------------------------------------------------------------------------------------------------------------------------------------|------|
| (CPS)                                                | Man (1.16%) and Xyl (0.06%).                                             |                                                                                                                                                                                                                                                                                                        |                                                                                                                                                                                  | ↓striatal Emr1, TNF- $\alpha$ , IL-1 $\beta$ and IL-6 in serum.<br>↑serum DAO and small intestinal secretory immunoglobulin A S-IgA                                                                                                                                                                                                                                |      |
| 19. <i>Bletilla striata</i> polysaccharides (BSP)    |                                                                          | A $\beta$ fibrils induced N2a cells for 24 h<br>10 $\mu$ M A $\beta$ induced BV-2 cells<br>100 mg/kg AlCl <sub>3</sub> induced SD rats three times every week, for eight weeks<br>5 $\mu$ l of 2 $\mu$ g/ $\mu$ l 6-OHDA solution was injected unilaterally into the median forebrain bundle at a time | Co-treated with 1 mg/mL BSP for 24 h<br>Co-treated with 1 mg/mL BSP for 24 h<br>Co-treated with 10 mg/kg/day for eight weeks<br>After-treated with 10, 50, 100 mg/kg for 14 days | ↓Learning memory<br>↑Cell Viability<br>↓Oxidative stress, Inflammation<br>↓A $\beta$ Fibril Formation, Morphological damage in the hippocampus and cortex<br>↓ROS, TNF- $\alpha$ , IL-6, and IL-10<br>↓BACE1<br>↑Spontaneity, coordination, learning and memory abilities<br>↓Inflammation<br>↓NLRP3, IL-1 $\beta$ , Caspase 1, and proCaspase 1<br>↓NLRP3 pathway | [82] |
| 20. <i>Antrodia camphorata</i> polysaccharides (ACP) |                                                                          | 6-OHDA induced MES23.5 for 24 h<br>5 $\mu$ l of 2 $\mu$ g/ $\mu$ l 6-OHDA solution was injected unilaterally into the median forebrain bundle at a time                                                                                                                                                | Pre-treated with 10, 20, 50mM for 3h<br>10, 50, and 100 mg/kg for 7 days.                                                                                                        | ↓NLRP3, ASC, caspase-1, IL-1 $\beta$ , IL-18, ROS<br>↓ROS-NLRP3 pathway                                                                                                                                                                                                                                                                                            | [85] |
| 21. <i>Sparassis crispa</i> polysaccharides (SCP-1)  | Galactoglucan, main chain contains (1 $\rightarrow$ 6)- $\beta$ -D-Glcp, | Oral with AlCl <sub>3</sub> (20/kg/d) and subcutaneously injected with D-Gal (120 mg/kg/d) for eight weeks                                                                                                                                                                                             | 25 mg/kg/d and 100 mg/kg/d once per day from the fifth week for four weeks                                                                                                       | ↓learning deficits and defective spatial recognition<br>↓Amyloidogenesis<br>↑Neurotransmitter levels ( $\gamma$ -aminobutyric acid, glutamate, and acetylcholine)                                                                                                                                                                                                  | [86] |

|                                                              |                                             |                                                                      |                                                                                  |                                                                                                                                                                                                                                                        |                                                                                                                                                                                                                                                                                                                                                                                                                                                                                                                                |  |
|--------------------------------------------------------------|---------------------------------------------|----------------------------------------------------------------------|----------------------------------------------------------------------------------|--------------------------------------------------------------------------------------------------------------------------------------------------------------------------------------------------------------------------------------------------------|--------------------------------------------------------------------------------------------------------------------------------------------------------------------------------------------------------------------------------------------------------------------------------------------------------------------------------------------------------------------------------------------------------------------------------------------------------------------------------------------------------------------------------|--|
|                                                              | (1 → 3)-β-D-Glcp,<br>(1 → 6)-α-D-Galp       |                                                                      |                                                                                  |                                                                                                                                                                                                                                                        | ↓Inflammatory cytokines<br>↑Reshaped the gut microbiota<br>↑Intestinal barrier function, SCFAs<br>↓TLR4 and NF-κB<br>↓Apoptosis and oxidative stress<br>↓Ca2+, ROS,<br>↑MMP, Bcl-2, Bcl-xL, p-AKT, p-GSK-3<br>↑AKT pathway.<br>↓Mitochondrial pathway<br>↑Behaviors related to memory and cognition<br>↓Synaptic loss<br>↓Microglial phagocytosis of Aβ plaques, Aβ1–40 and Aβ1–42<br>↑Reconstructed the gut microbiota composition<br>↓Gut barrier integrity damage, inflammatory responses, and the intestinal Aβ deposition |  |
| 22. <i>Sparassis crispa</i><br>polysaccharides<br>(SCWEA)    | 75kDa;<br>Rha, Man, and Gal<br>(Gal) 10:2:1 | 25 mM L-Glu induced<br>PC12 cell for 24 h                            | Pre-treated 4 μg/mL for 3 h                                                      |                                                                                                                                                                                                                                                        | [109]                                                                                                                                                                                                                                                                                                                                                                                                                                                                                                                          |  |
|                                                              | 18.796 kDa                                  | 5 × FAD mice                                                         | 30 mg/kg per day at 3<br>months                                                  |                                                                                                                                                                                                                                                        | [87]                                                                                                                                                                                                                                                                                                                                                                                                                                                                                                                           |  |
| 23. <i>Polygonatum sibiricum</i><br>polysaccharides<br>(PSP) |                                             | 30 mg/kg MPTP (i.p.)<br>induced C57BL/6J male<br>mice for five days. | 10, 30 mg/kg PSP orally started<br>30 days before MPTP induction,<br>for 45 days | ↑Motor abilities<br>↓Apoptosis, Oxidative Stress, Dopaminergic<br>neurodegeneration<br>↓ROS<br>↑GSH/GSSG<br>↑p-Akt, p-mTOR, Nrf2, NQO1, HO-1, Gclc, Gclm<br>↑Akt/mTOR and Nrf2 Pathways<br>↓Bax/Bcl-2 ratio, caspase-3<br>↑p-Akt<br>↑PI3K/AKT pathways | [118]                                                                                                                                                                                                                                                                                                                                                                                                                                                                                                                          |  |
|                                                              | 76 kDa, Gal:Man<br>(12.1:5.4)               | 20μM Aβ25–35-induced<br>neurotoxicity in PC12 cells                  | Pre-treated with 10, 20, 50, 100<br>and 200 μg/ml for 24 h                       |                                                                                                                                                                                                                                                        | [124]                                                                                                                                                                                                                                                                                                                                                                                                                                                                                                                          |  |

|                                                                    |                               |                                                                           |                                                                     |                                                                                                                                                                              |       |
|--------------------------------------------------------------------|-------------------------------|---------------------------------------------------------------------------|---------------------------------------------------------------------|------------------------------------------------------------------------------------------------------------------------------------------------------------------------------|-------|
| 24. <i>Spirulina platensis</i> polysaccharides (PSP1)              |                               | Male C57BL/6J mice (i.p.) with 15 mg/kg MPTP 4 times, at 6-hour intervals | Pre-treated with 200, 400, or 800 mg/kg for 10 days                 | ↓Oxidative stress<br>↑TH and DAT protein and mRNA in the SN pars compacta<br>↑SOD, and GSH-Px                                                                                | [102] |
| 25. Edible <i>Dictyophora echinovolvata</i> polysaccharides (DEVP) |                               | PC12 cells induced by 750mM H <sub>2</sub> O <sub>2</sub> for 24 h        | Pre-treated with 10, 30, 100, 250, 500 mM for 2 h                   | ↓Apoptosis and oxidative stress<br>↑Bax, caspases 3, cytochrome c<br>↓ Bcl-2, ROS<br>↓Mitochondrial apoptotic pathway<br>↓Apoptosis and oxidative stress                     | [107] |
| 26. <i>Tremella fuciformis</i> polysaccharides (TL04)              | Rha, Man and Glc, 1:5.04:1.87 | 20 mM L-Glu induced PC12 cells for 12-24 h                                | Pre-treated 5 and 20 µg TL04 for 3h                                 | ↓ROS, caspase 3, Bax, Cyto C, caspase 8, caspase 9 and caspase 3, LDH<br>↑Bcl-2<br>↓Mitochondrial pathway<br>↑Horizontal movements, learning and memory, cognitive abilities | [108] |
| 27. <i>Armillaria mellea</i> polysaccharides (AMPS)                |                               | HT22 cells incubated with 25mM of L-Glu for another 24 h                  | Pretreated with AMPSc at doses of 40 and 80 µg/mL for 3 h           | ↓Apoptosis and oxidative stress<br>↓Aβ <sub>1-40</sub> and p-Tau aggregations<br>↓MMP, ROS, AchE, ROS<br>↑Ach, ChAT, SOD, GSH-Px, 4-NHE<br>↓Oxidative stress and apoptosis   | [110] |
| 28. <i>Morchella importuna</i> polysaccharides (MIP)               |                               | PC12 cells induced by 0.8mM H <sub>2</sub> O <sub>2</sub> for 6h          | Pre-treated with 12.5, 50, 100, 200, 400, 800µg/ml for half an hour | ↑SOD, CAT, GSHPx<br>↓ Bcl-2, Bax, caspase-3<br>↑ERK pathway<br>↓NF-κB pathway and the p38-JNK pathway                                                                        | [113] |
| 29. <i>Acorus tatarinowii</i> polysaccharides (ATP)                |                               | 1 µg/mL LPS induced proinflammatory BV2 cells for 24 h                    | Pretreated with 2.5, 5.0, 10 µM for 2 h.                            | ↓NF-κB, TLR4, MyD88, p-PI3K, p-Akt,<br>↓ROS, MMP, TNF-α, IL-1β, IL-6, COX2, and iNOS                                                                                         | [115] |

|                                                                                         |                            |                                                                                                                                                                                                                                                 |                                                                                                                                                                                |                                                                                                                                                                                                                                       |       |
|-----------------------------------------------------------------------------------------|----------------------------|-------------------------------------------------------------------------------------------------------------------------------------------------------------------------------------------------------------------------------------------------|--------------------------------------------------------------------------------------------------------------------------------------------------------------------------------|---------------------------------------------------------------------------------------------------------------------------------------------------------------------------------------------------------------------------------------|-------|
|                                                                                         |                            |                                                                                                                                                                                                                                                 |                                                                                                                                                                                | ↓TLR4-mediated MyD88/NF-κB and PI3K/Akt signaling pathways<br>↑Learning and memory abilities<br>↓Apoptosis, Inflammation<br>↓TNF-α, IL-6 and IL-1β in serum, NF-κBp65 and IκB-a mRNA level<br>↓p-NF-κB-p65, p-IκB-a<br>↓NF-κB pathway |       |
| 30. <i>Vitis vinifera L.</i> polysaccharides (VTP)                                      |                            | 10mL of 2mg/mL Aβ25–35 slowly injected into the hippocampal CA1 region (5ml per side) of Sprague Dawley rats, 1 time                                                                                                                            | 50, 150, 300 mg/kg VTP for 14 days.                                                                                                                                            |                                                                                                                                                                                                                                       | [141] |
| 31. <i>Taxus chinensis var. mairei</i> Cheng et L.K.Fu (Taxaceae) polysaccharides (PTM) |                            | 150mg/kg/d D-Gal induced C57BL/6 mice (i.p.) for 6 weeks<br>BV2 induced by 1M D-gal for 48 h.<br>Balb/c male mice subcutaneously injected with 120 mg/kg of D-gal and orally treated with 20 mg/kg of AlCl <sub>3</sub> once a day for 8 weeks. | After-treated with 1, 10, 20, 50, 100 and 150mg/kg/d for 6 weeks<br>Pre-treated with 500 μg/mL for 48 h.<br>Starting from the fifth week, 25 and 100 mg/kg/day for four weeks. | ↑Spatial learning capability, cognitive function<br>↓Oxidative stress<br>↓Deposition of Aβ1–42<br>↓MDA, ROS, SOD, caspase-3, Bax/Bcl-2<br>↑Nrf2 pathway                                                                               | [142] |
| 32. <i>Pleurotus ostreatus</i> polysaccharides (POP)                                    |                            | Male Wistar rats induced by Al (200 mg/kg, i.g.) and D-gal (60 mg/kg, i.p.) for 60 days                                                                                                                                                         | On the 30th day of modeling, POP (400 mg/kg) i.g. for 30 days                                                                                                                  | ↑Learning and memory performance<br>↓Oxidative stress<br>↓AChE, APP, Aβ, BACE-1, p-tau, and GSK3β<br>↑SOD, GSH-Px, CAT, PP2A                                                                                                          | [143] |
| 33. <i>Alpinia oxyphylla</i> polysaccharides (AOP)                                      | 76.66 kDa; Man, Rha, GlcA, | 1 mg/kg/d scopolamine induced male Kunming (KM) mice for 23 days                                                                                                                                                                                | Co-treated with 70 500 mg/kg/d for 23 days                                                                                                                                     | ↑Memory abilities<br>↓Inflammation<br>↓NO, IL-1β, PGE-2, and TNF-α in serum                                                                                                                                                           | [144] |

|                                                                   |                                                                                          |                                                                |                                           |                                                                                                              |       |
|-------------------------------------------------------------------|------------------------------------------------------------------------------------------|----------------------------------------------------------------|-------------------------------------------|--------------------------------------------------------------------------------------------------------------|-------|
|                                                                   | Glc, Gal, Xyl, and<br>Ara (2.60:<br>1.95:6.73: 1.81:<br>21.08: 40.59:<br>43.83)          | 1 µg/mL LPS of BV2 cells<br>for 24 h                           | 0.325, 0.65, 1.30, 2.60 µM for 24<br>h    |                                                                                                              |       |
| 34. <i>Gynostemma<br/>pentaphyllum</i><br>polysaccharides<br>(GP) |                                                                                          | 1 mM MPP+ induced<br>PC12 cells for 24 h                       | Pre-incubated 50µg/ml for 2 h             | ↓Apoptosis<br>↓Bax/Bcl-2 ratio, cytc c, caspase-3/9, cleavage of<br>PARP<br>↓Mitochondrial apoptotic pathway | [145] |
|                                                                   |                                                                                          | 70 mM paraquat induced<br>wildtype <i>C. elegans</i>           | 0.5, 1, 2 mg/mL until death               | ↑Survival rate                                                                                               |       |
| 35. <i>Dictyophora<br/>indusiata</i><br>polysaccharides<br>(DiP)  | 86.8%Man, 4.5%<br>Fucose, 3.9% Glc,<br>1.6% Gal, 1.2%<br>Rha, 1.1% GlcA<br>and 0.9% Xyl. | 10 mM paraquat induced<br><i>C. elegans</i> CL2166 for 24<br>h | 1.0 mg/mL for 48 h                        | ↓Oxidative stress<br>↓ ROS, MDA, MMP<br>↑SOD, ATP                                                            | [146] |
|                                                                   |                                                                                          | <i>C. elegans</i> LG345                                        | 1.0 mg/mL at 20°C from L1 to<br>L2 larvae | ↑DAF-16/FOXO                                                                                                 |       |
|                                                                   |                                                                                          | <i>C. elegans</i> GR1352                                       | 1.0 mg/mL at 20°C from L1 to<br>L3 larvae |                                                                                                              |       |
|                                                                   |                                                                                          | <i>C. elegans</i> HA759                                        | 1.0 mg/ml for 72 h                        | ↓Behavioral dysfunction (avoidance assay)                                                                    |       |

Man,Mannose; Rha, Rhamnose; Glc, Glucose; Ara, Arabinose; Xyl, Xylose; GlcA, Glucuronic acid; GalA, Galacturonic acid; Gal, Galactose; i.g. intragastrically; i.p, intraperitoneal injection; EGF, epidermal growth factor; bFGF, basic FGF.↑ indicates increase/promotion/activation while ↓ indicates inhibition/reduction/inactivation.

## References

- 133.Cao, S.; Du, J.; Hei, Q. Lycium barbarum polysaccharide protects against neurotoxicity via the Nrf2-HO-1 pathway. *Exp. Ther. Med.* **2017**, *14*, 4919–4927. <https://doi.org/10.3892/etm.2017.5127>.
- 134.Zhou, L.S.; Liao, W.F.; Chen, X.; Yue, H.; Li, S.J.; Ding, K. An arabinogalactan from fruits of *Lycium barbarum* L. inhibits production and aggregation of A beta(42). *Carbohydr. Polym.* **2018**, *195*, 643–651. <https://doi.org/10.1016/j.carbpol.2018.05.022>.
- 135.Gao, K.; Liu, M.; Cao, J.; Yao, M.; Lu, Y.; Li, J.; Zhu, X.; Yang, Z.; Wen, A. Protective effects of *Lycium barbarum* polysaccharide on 6-OHDA-induced apoptosis in PC12 cells through the ROS-NO pathway. *Molecules* **2014**, *20*, 293–308. <https://doi.org/10.3390/molecules20010293>.
- 136.Hu, Y.R.; Xing, S.; Chen, C.A.; Shen, D.; Chen, J. Codonopsis pilosula Polysaccharides Alleviate ABETA(1–40)-Induced PC12 Cells Energy Dysmetabolism via CD38/NAD<sup>+</sup> Signaling Pathway. *Curr. Alzheimer Res.* **2021**, *18*, 208–221. <https://doi.org/10.2174/1567205018666210608103831>.
- 137.Huang, Y.C.; Tsay, H.J.; Lu, M.K.; Lin, C.H.; Yeh, C.W.; Liu, H.K.; Shiao, Y.J. Astragalus membranaceus-Polysaccharides Ameliorates Obesity, Hepatic Steatosis, Neuroinflammation and Cognition Impairment without Affecting Amyloid Deposition in Metabolically Stressed APP<sup>swe</sup>/PS1dE9 Mice. *Int. J. Mol. Sci.* **2017**, *18*, 2746. <https://doi.org/10.3390/ijms18122746>.
- 138.Li, H.F.; Shi, R.N.; Ding, F.; Wang, H.Y.; Han, W.J.; Ma, F.L.; Hu, M.H.; Ma, C.W.; Huang, Z.B. Astragalus Polysaccharide Suppresses 6-Hydroxydopamine-Induced Neurotoxicity in *Caenorhabditis elegans*. *Oxidative Med. Cell. Longev.* **2016**, *2016*, 4856761. <https://doi.org/10.1155/2016/4856761>.
- 139.Wang, X.L.; Yi, K.X.; Zhao, Y. Fucoidan inhibits amyloid-beta-induced toxicity in transgenic *Caenorhabditis elegans* by reducing the accumulation of amyloid-beta and decreasing the production of reactive oxygen species. *Food Funct.* **2018**, *9*, 552–560. <https://doi.org/10.1039/c7fo00662d>.
- 140.Xing, M.M.; Li, G.Y.; Liu, Y.; Yang, L.Y.; Zhang, Y.J.; Zhang, Y.R.; Ding, J.H.; Lu, M.; Yu, G.L.; Hu, G. Fucoidan from *Fucus vesiculosus* prevents the loss of dopaminergic neurons by alleviating mitochondrial dysfunction through targeting ATP5F1a. *Carbohydr. Polym.* , **2023**, *303*, 120470. <https://doi.org/10.1016/j.carbpol.2022.120470>.
- 141.Ma, L.J.; Wang, X.M.; Li, Y.; Xiao, H.; Yuan, F. Effect of polysaccharides from *Vitis vinifera* L. on NF-kappa B/I kappa B-alpha signal pathway and inflammatory factors in Alzheimer's model rats. *Biotechnol. Biotechnol. Equip.* **2018**, *32*, 1012–1020. <https://doi.org/10.1080/13102818.2018.1464948>.
- 142.Zhang, S.; Li, L.; Hu, J.; Ma, P.; Zhu, H. Taxus chinensis Polysaccharide of var. Cheng et L.K.Fu attenuates neurotoxicity and cognitive dysfunction in mice with Alzheimer's disease. *Pharm. Biol.* **2020**, *58*, 959–968. <https://doi.org/10.1080/13880209.2020.1817102>.
- 143.Zhang, Y.; Yang, X.M.; Jin, G.; Yang, X.D.; Zhang, Y. Polysaccharides from *Pleurotus ostreatus* alleviate cognitive impairment in a rat model of Alzheimer's disease. *Int. J. Biol. Macromol.* **2016**, *92*, 935–941. <https://doi.org/10.1016/j.ijbiomac.2016.08.008>.
- 144.Shi, W.T.; Zhong, J.; Zhang, Q.; Yan, C.Y. Structural characterization and antineuroinflammatory activity of a novel heteropolysaccharide obtained from the fruits of *Alpinia oxyphylla*. *Carbohydr. Polym.* **2020**, *229*, 115405. <https://doi.org/10.1016/j.carbpol.2019.115405>.
- 145.Deng, Q.; Yang, X. Protective effects of *Gynostemma pentaphyllum* polysaccharides on PC12 cells impaired by MPP(+). *Int. J. Biol. Macromol.* **2014**, *69*, 171–175. <https://doi.org/10.1016/j.ijbiomac.2014.05.049>.
- 146.Zhang, J.; Shi, R.; Li, H.; Xiang, Y.; Xiao, L.; Hu, M.; Ma, F.; Ma, C.; Huang, Z. Antioxidant and neuroprotective effects of *Dictyophora indusiata* polysaccharide in *Caenorhabditis elegans*. *J. Ethnopharmacol.* **2016**, *192*, 413–422. <https://doi.org/10.1016/j.jep.2016.09.031>.
